# Supplementary material for: Normalizing the Local Incidence Angle in Sentinel-1 Imagery to Improve Leaf Area Index, Vegetation Height, and Crop Coefficient Estimations
Source: MDPI journal article supplement (doi:10.3390/land10070680), 2021-06-28
Supplement: s1 [file s1]

**Table S1.** Sentinel-1 image inventory used in the development of models for wheat. Each line represents a dataset with specific geometrical parameters.

| Area  | Orbit     | Local Incidence Angle (°) | Wheat Height Model     |                  | Wheat LAI Model        |                  | Wheat K <sub>c</sub> Model |                  |
|-------|-----------|---------------------------|------------------------|------------------|------------------------|------------------|----------------------------|------------------|
|       |           |                           | Period*                | # of images used | Period*                | # of images used | Period*                    | # of images used |
| Saad  | Ascending | 36.5–36.6                 | 29-Jan-18<br>05-Apr-18 | 11               | 10-Feb-18<br>05-Apr-18 | 9                | 06-Mar-18<br>05-Apr-18     | 5                |
| Saad  | Ascending | 47.7                      | 28-Jan-18<br>04-Apr-18 | 12               | 09-Feb-18<br>04-Apr-18 | 10               | 05-Mar-18<br>04-Apr-18     | 6                |
| Yavne | Ascending | 35.3–35.4                 | 06-Jan-19<br>06-Apr-19 | 15               | 12-Jan-19<br>06-Apr-19 | 15               | -                          | -                |

Note: \* Period indicates the starting and ending dates.

**Table S2.** Sentinel-1 image inventory used in the development of models for cotton. Each line represents a dataset with specific geometrical parameters.

| Area    | Orbit      | Local Incidence Angle (°) | Cotton K <sub>c</sub> Model |                  | Cotton Height Model    |                  |
|---------|------------|---------------------------|-----------------------------|------------------|------------------------|------------------|
|         |            |                           | Period*                     | # of images used | Period*                | # of images used |
| Tel Nof | Ascending  | 35.9                      | 08-Jul-16<br>25-Aug-16      | 5                | 20-Jul-16<br>13-Aug-16 | 2                |
| Tel Nof | Descending | 46.1                      | 04-Jul-16<br>02-Sep-16      | 6                | 04-Jul-18<br>09-Aug-18 | 4                |
| Negba   | Ascending  | 36.0                      | -                           | -                | 27-Jul-17<br>08-Aug-17 | 2                |
| Negba   | Descending | 34.5                      | -                           | -                | 03-Aug-17              | 1                |
| Negba   | Descending | 45.6                      | -                           | -                | 29-Jul-17<br>10-Aug-17 | 3                |

Note: \* Period indicates the starting and ending dates.

**Table S3.** Sentinel-1 image inventory used in the development of models for processing tomatoes. Each line represents a dataset with specific geometrical parameters.

| Area        | Orbit      | Local Incidence Angle (°) | K <sub>c</sub>           |                  | LAI                    |                  | Height                 |                  |
|-------------|------------|---------------------------|--------------------------|------------------|------------------------|------------------|------------------------|------------------|
|             |            |                           | Period*                  | # of images used | Period*                | # of images used | Period*                | # of images used |
| Gadash 2018 | Ascending  | 42.3–42.7                 | -                        | -                | -                      | -                | 17-May-18<br>03-Aug-18 | 14               |
| Gadash 2018 | Descending | 30.8–31.2                 | -                        | -                | -                      | -                | 18-May-18<br>04-Aug-18 | 14               |
| Gadash 2018 | Descending | 42.2–43.6                 | -                        | -                | -                      | -                | 19-May-18<br>30-Jul-18 | 12               |
| Gadash 2019 | Ascending  | 42.0–42.1                 | 06-May-19<br>23-Jul-19   | 13               | 18-May-19<br>23-Jul-19 | 11               | 06-May-19<br>23-Jul-19 | 13               |
| Gadash 2019 | Descending | 43.3–43.4                 | 07-May-19<br>13-Jul-19   | 6                | 26-May-19<br>13-Jul-19 | 5                | 07-May-19<br>13-Jul-19 | 6                |
| Gadash 2019 | Descending | 31.6–31.7                 | 07-May-19<br>18-Jul-19   | 6                | 09-May-19<br>18-Jul-19 | 5                | 07-May-19<br>18-Jul-19 | 6                |
| Gadot       | Ascending  | 43.1                      | 30-April-19<br>10-Aug-19 | 17               | 18-May-19<br>10-Aug-19 | 14               | 18-May-19<br>10-Aug-19 | 14               |
| Gadot       | Descending | 30.3                      | 07-May-19<br>11-Aug-19   | 8                | 19-May-19<br>11-Aug-19 | 7                | 19-May-19<br>11-Aug-19 | 7                |
| Gadot       | Descending | 42.1                      | 14-May-19<br>12-Aug-19   | 9                | 26-May-19<br>12-Aug-19 | 8                | 26-May-19<br>12-Aug-19 | 8                |

Note: \* Period indicates the starting and ending dates

**Table S4.** Wheat height, LAI, and K<sub>c</sub> models.

|                                  | Height                                                | LAI                                                   | K <sub>c</sub>                                        |
|----------------------------------|-------------------------------------------------------|-------------------------------------------------------|-------------------------------------------------------|
| Overpass                         | Asc                                                   | Asc                                                   | Asc                                                   |
| # SAR images used                | 38                                                    | 34                                                    | 11                                                    |
| Local incidence angle (°)        | 35.3–47.7                                             | 35.3–47.7                                             | 36.5–47.7                                             |
| Backscatter processing algorithm | $x = \sigma_{VH}^0 * \theta - \sigma_{VV}^0 * \theta$ | $x = \sigma_{VH}^0 * \theta + \sigma_{VV}^0 * \theta$ | $x = \sigma_{VH}^0 * \theta + \sigma_{VV}^0 * \theta$ |
| R <sup>2</sup>                   | 0.8566                                                | 0.7225                                                | 0.6722                                                |
| RMSE                             | 6 cm                                                  | 0.6                                                   | 0.073                                                 |
| RMSE Saad                        | 6 cm                                                  | 0.6                                                   | 0.073                                                 |
| RMSE Yavne                       | 6 cm                                                  | 0.6                                                   | -                                                     |

| $R_0^2$ backscatter<br>processing algorithm | $x=\sigma_{VH}^0 - \sigma_{VV}^0$ | $x=\sigma_{VH}^0 + \sigma_{VV}^0$ | $x=\sigma_{VH}^0 + \sigma_{VV}^0$ |
|---------------------------------------------|-----------------------------------|-----------------------------------|-----------------------------------|
| $R_0^2$                                     | 0.7828                            | 0.5636                            | 0.5121                            |
| Model's $R^2$ improvement                   | 0.0738                            | 0.1589                            | 0.1601                            |
| Z $R^2$                                     | 2.217                             | 3.388                             | 0.863                             |
| p $R^2$                                     | 0.026595                          | 0.000704                          | 0.38801 (NS)                      |
| RMSE <sub>0</sub>                           | 8 cm                              | 0.8                               | 0.089                             |
| Model's RMSE improvement<br>(%)             | 2 cm<br>(25)                      | 0.2<br>(25)                       | 0.016<br>(18)                     |
| Z RMSE                                      | 0.0218                            | -1.7866                           | -0.1778                           |
| p RMSE                                      | 0.98404 (NS)                      | 0.07346 (NS)                      | 0.85716 (NS)                      |

**Table S5.** Processing tomato height, LAI, and K<sub>c</sub> models based on the  $\sigma^0$  normalization method.

|                                           | Height                     | LAI                                                 | K <sub>c</sub>             |
|-------------------------------------------|----------------------------|-----------------------------------------------------|----------------------------|
| Overpass                                  | Asc and Dsc                | Asc and Dsc                                         | Asc and Dsc                |
| # SAR images used                         | 94                         | 50                                                  | 59                         |
| Local incidence angle (°)                 | 30.3–43.6                  | 30.3–43.6                                           | 30.3–43.6                  |
| Backscatter<br>processing algorithm       | $x=\sigma_{VV}^0 * \theta$ | $x=\sigma_{VH}^0 * \theta + \sigma_{VV}^0 * \theta$ | $x=\sigma_{VV}^0 * \theta$ |
| $R^2$                                     | 0.4201                     | 0.7881                                              | 0.8549                     |
| RMSE                                      | 11 cm                      | 1.0                                                 | 0.0871                     |
| RMSE Gadash 2018                          | 11 cm                      | -                                                   | -                          |
| RMSE Gadash 2019                          | 12 cm                      | 0.8                                                 | 0.0940                     |
| RMSE Gadot                                | 10 cm                      | 1.2                                                 | 0.0905                     |
| $R_0$ backscatter<br>processing algorithm | $x=\sigma_{VV}^0$          | $x=\sigma_{VH}^0 + \sigma_{VV}^0$                   | $x=\sigma_{VV}^0$          |
| $R_0^2$                                   | 0.3755                     | 0.688                                               | 0.8377                     |
| Model's $R^2$ improvement                 | 0.0446                     | 0.1001                                              | 0.0172                     |
| Z $R^2$                                   | 0.921                      | 1.668                                               | 0.517                      |
| p $R^2$                                   | 0.357227 (NS)              | 0.095402 (NS)                                       | 0.60509 (NS)               |
| RMSE <sub>0</sub>                         | 12 cm                      | 2.1                                                 | 0.0921                     |
| Model's RMSE improvement<br>(%)           | 1 cm<br>(8)                | 1.1<br>(52)                                         | 0.005<br>(5)               |
| Z RMSE                                    | 0.1263                     | -6.1347                                             | -5.2836                    |
| p RMSE                                    | 0.89656 (NS)               | < 0.00001                                           | < 0.00001                  |

**Table S6.** Cotton height and  $K_c$  models based on the  $\sigma^0$  normalization method.

|                                                              | Height                                                | $K_c$                        |
|--------------------------------------------------------------|-------------------------------------------------------|------------------------------|
| Overpass                                                     | Asc and Dsc                                           | Asc and Dsc                  |
| # SAR images used                                            | 11                                                    | 12                           |
| Local incidence angle (°)                                    | 35.9–46.1                                             | 34.5–46.1                    |
| Backscatter processing algorithm                             | $x = \sigma_{VH}^0 * \theta - \sigma_{VV}^0 * \theta$ | $x = \sigma_{VV}^0 * \theta$ |
| R <sup>2</sup>                                               | 0.8721                                                | 0.3747                       |
| RMSE                                                         | 5 cm                                                  | 0.0511                       |
| RMSE Tel Nof                                                 | 5 cm                                                  | 0.0183                       |
| RMSE Negba                                                   | -                                                     | 0.0698                       |
| R <sub>0</sub> <sup>2</sup> backscatter processing algorithm | $x = \sigma_{VH}^0 - \sigma_{VV}^0$                   | $x = \sigma_{VV}^0$          |
| R <sub>0</sub> <sup>2</sup>                                  | 0.5051                                                | 0.0199                       |
| Model's R <sup>2</sup> improvement                           | 0.367                                                 | 0.3548                       |
| Z R <sup>2</sup>                                             | 1.894                                                 | 2.071                        |
| p R <sup>2</sup>                                             | 0.058205 (NS)                                         | 0.038389                     |
| RMSE <sub>0</sub>                                            | 10 cm                                                 | 0.0639                       |
| Model's RMSE improvement (%)                                 | 5 cm<br>(50)                                          | 0.0128<br>(21)               |
| Z RMSE                                                       | -0.1778                                               | -3.0594                      |
| p RMSE                                                       | 0.85716 (NS)                                          | 0.00222                      |

**Table S7.** Processing tomato height, LAI, and  $K_c$  models based on the  $\beta^0$  normalization methods.

|                                  | Height             | LAI                                                                                                                       | $K_c$                                                          |
|----------------------------------|--------------------|---------------------------------------------------------------------------------------------------------------------------|----------------------------------------------------------------|
| Overpass                         | Asc and Dsc        | Asc and Dsc                                                                                                               | Asc and Dsc                                                    |
| # SAR images used                | 94                 | 50                                                                                                                        | 59                                                             |
| Local incidence angle (°)        | 30.3–43.6          | 30.3–43.6                                                                                                                 | 30.3–43.6                                                      |
| Backscatter processing algorithm | $x = \beta_{VV}^0$ | $x = \frac{\beta_{VH}^0}{\sin(\text{Radians}(90 - \theta)^3)} + \frac{\beta_{VV}^0}{\sin(\text{Radians}(90 - \theta)^3)}$ | $x = \frac{\beta_{VV}^0}{\sin(\text{Radians}(90 - \theta)^3)}$ |
| R <sup>2</sup>                   | 0.8107             | 0.8341                                                                                                                    | 0.871                                                          |
| RMSE                             | 9 cm               | 0.9                                                                                                                       | 0.0821                                                         |
| RMSE Gadash 2018                 | 7 cm               | -                                                                                                                         | -                                                              |
| RMSE Gadash 2019                 | 9 cm               | 0.8                                                                                                                       | 0.0636                                                         |

|                                                 |                    |                                   |                    |
|-------------------------------------------------|--------------------|-----------------------------------|--------------------|
| RMSE Gadot                                      | 10 cm              | 1.0                               | 0.0935             |
| R <sub>0</sub> backscatter processing algorithm | $x = \beta_{VV}^0$ | $x = \beta_{VH}^0 + \beta_{VV}^0$ | $x = \beta_{VV}^0$ |
| R <sub>0</sub> <sup>2</sup>                     | 0.4665             | 0.4821                            | 0.7567             |
| Model's R <sup>2</sup> improvement              | 0.3442             | 0.352                             | 0.1143             |
| Z R <sup>2</sup>                                | 4.429              | 4.17                              | 2.395              |
| p R <sup>2</sup>                                | 0.000009           | 0.000031                          | 0.016634           |
| RMSE <sub>0</sub>                               | 11 cm              | 1.6                               | 0.1128             |
| Model's RMSE improvement (%)                    | 2 cm<br>(18)       | 0.7<br>(44)                       | 0.0307<br>(27)     |
| Z RMSE                                          | -1.7893            | 0.0241                            | -1.6907            |
| p RMSE                                          | 0.07346 (NS)       | 0.98404 (NS)                      | 0.09102 (NS)       |

**Table S8.** Cotton height and K<sub>c</sub> models based on the  $\beta^0$  normalization method.

|                                                              | Height                            | K <sub>c</sub>                    |
|--------------------------------------------------------------|-----------------------------------|-----------------------------------|
| Overpass                                                     | Asc and Dsc                       | Asc and Dsc                       |
| # SAR images used                                            | 11                                | 12                                |
| Local incidence angle (°)                                    | 35.9–46.1                         | 34.5–46.1                         |
| Backscatter processing algorithm                             | $x = \beta_{VH}^0 + \beta_{VV}^0$ | $x = \beta_{VH}^0 + \beta_{VV}^0$ |
| R <sup>2</sup>                                               | 0.9467                            | 0.707                             |
| RMSE                                                         | 8 cm                              | 0.1293                            |
| RMSE Tel Nof                                                 | 8 cm                              | 0.1620                            |
| RMSE Negba                                                   | -                                 | 0.0849                            |
| R <sub>0</sub> <sup>2</sup> backscatter processing algorithm | $x = \beta_{VH}^0 + \beta_{VV}^0$ | $x = \beta_{VH}^0 + \beta_{VV}^0$ |
| R <sub>0</sub> <sup>2</sup>                                  | 0.2779                            | 0.0717                            |
| Model's R <sup>2</sup> improvement                           | 0.668                             | 0.6353                            |
| Z R <sup>2</sup>                                             | 3.536                             | 1.912                             |
| p R <sup>2</sup>                                             | 0.000407                          | 0.055925 (NS)                     |
| RMSE <sub>0</sub>                                            | 13 cm                             | 0.1672                            |
| Model's RMSE improvement (%)                                 | 5 cm<br>(38)                      | 0.0379<br>(23)                    |
| Z RMSE                                                       | 0                                 | -2.6672                           |
| p RMSE                                                       | 1 (NS)                            | 0.00758                           |
